# Supplementary material
Source: PubMed Central journal article supplement (PMC10880152)

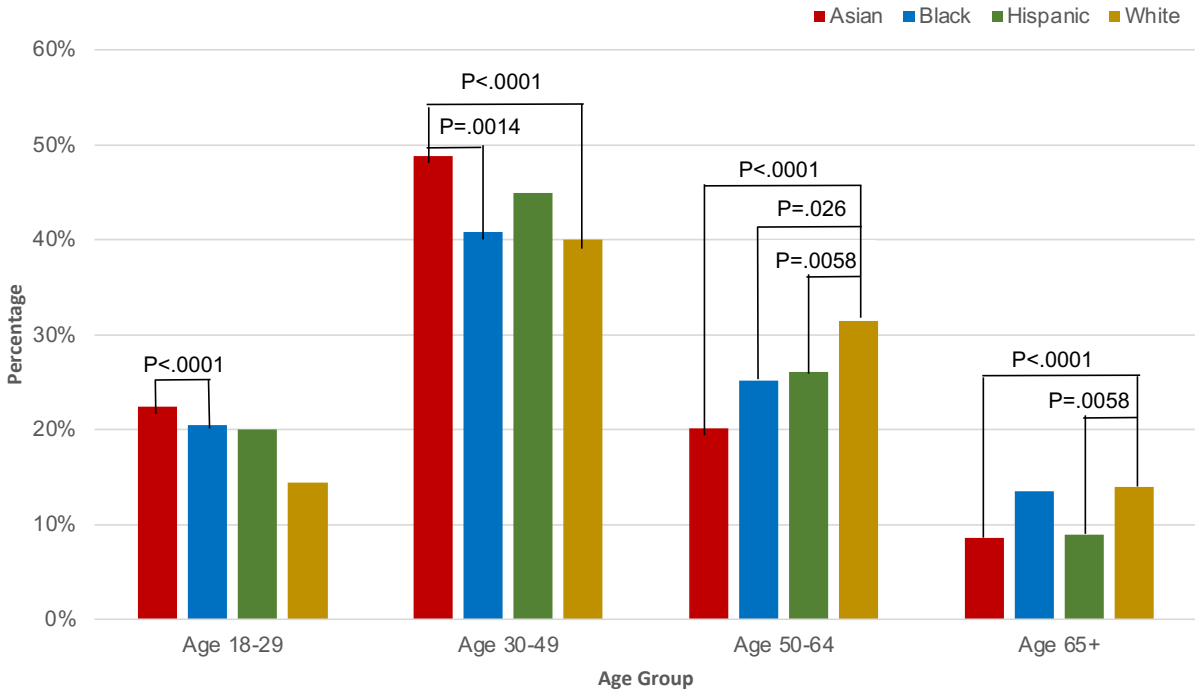

Supplement: 9758408.f6.pdf [file 9758408.f6.pdf]
